# Supplementary figures and images for: Thermal effect of annealing-temperature on solution-processed high-k ZrO2 dielectrics
Source: Royal Society of Chemistry journal article supplement (doi:10.1039/c9ra06132k), 2019-01-01

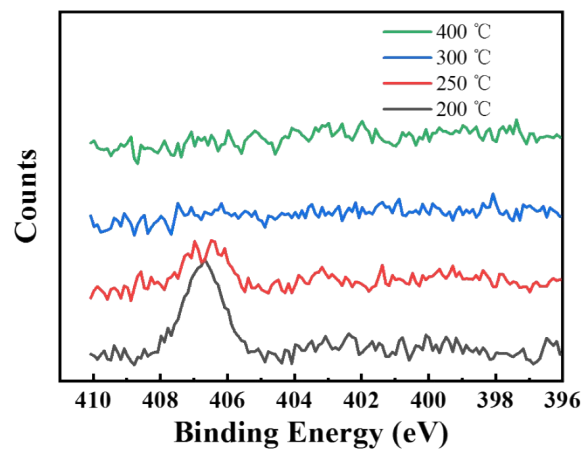

Figure S1. N 1s spectra of ZrO<sub>2</sub> films with different post-annealing temperatures.

Supplement: c9ra06132k1.pdf [file c9ra06132k1.pdf]
